# Supplementary material for: Fabrication of Cross-Linked PMMA/SnO2 Nanocomposites for Highly Efficient Removal of Chromium (III) from Wastewater
Source: MDPI journal article supplement (doi:10.3390/polym14102101), 2022-05-21
Supplement: s1 [file s1]

# Fabrication of Cross-Linked PMMA/SnO<sub>2</sub> Nanocomposites for Highly Efficient Removal of Chromium (III) from Wastewater

Nazeeha S. Alkayal

Chemistry Department, Faculty of Science, King Abdulaziz University, P.O. Box 80203, Jeddah 21589, Saudi Arabia; nalkayal@kau.edu.sa

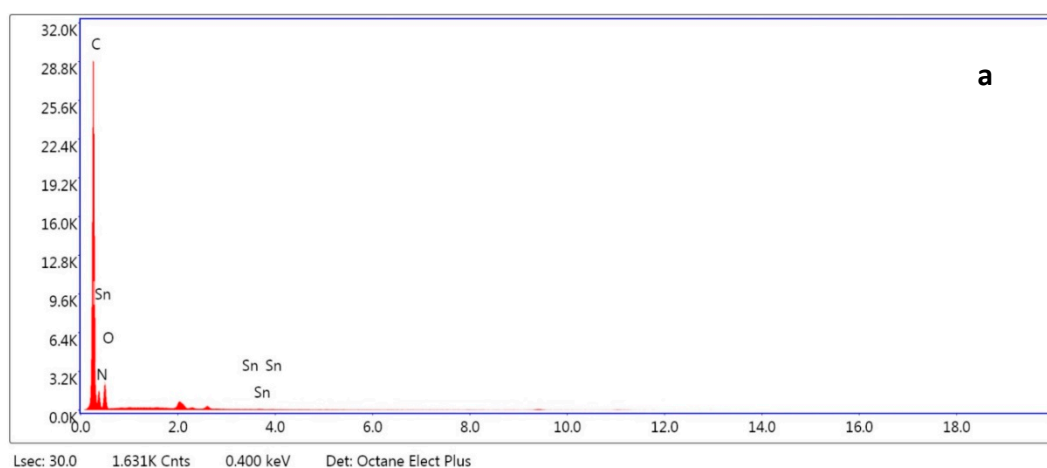

| Element | Weight % | Atomic % |
|---------|----------|----------|
| C K     | 61.93    | 66.71    |
| N K     | 22.04    | 20.36    |
| O K     | 16.00    | 12.93    |
| SnL     | 0.03     | 0.00     |

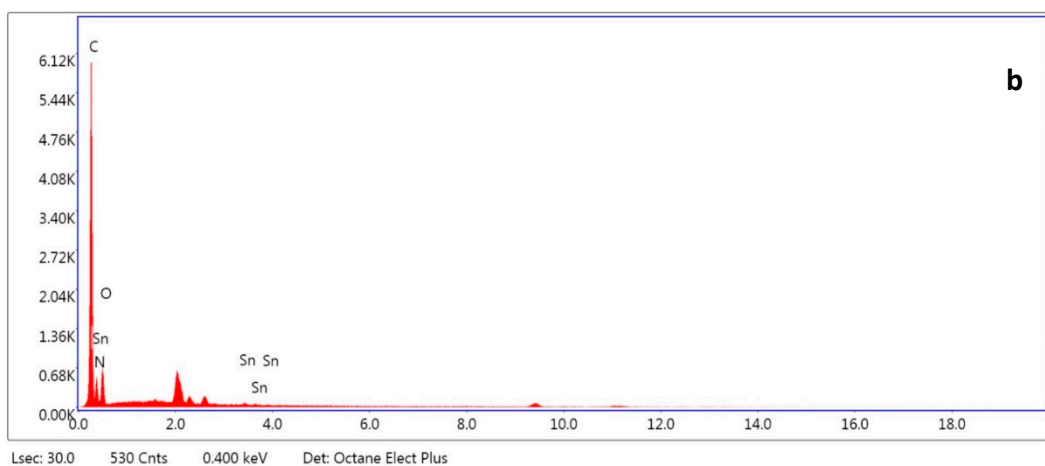

| Element | Weight % | Atomic % |
|---------|----------|----------|
| C K     | 68.14    | 72.98    |
| N K     | 16.84    | 15.47    |
| O K     | 14.25    | 11.46    |
| SnL     | 0.77     | 0.08     |

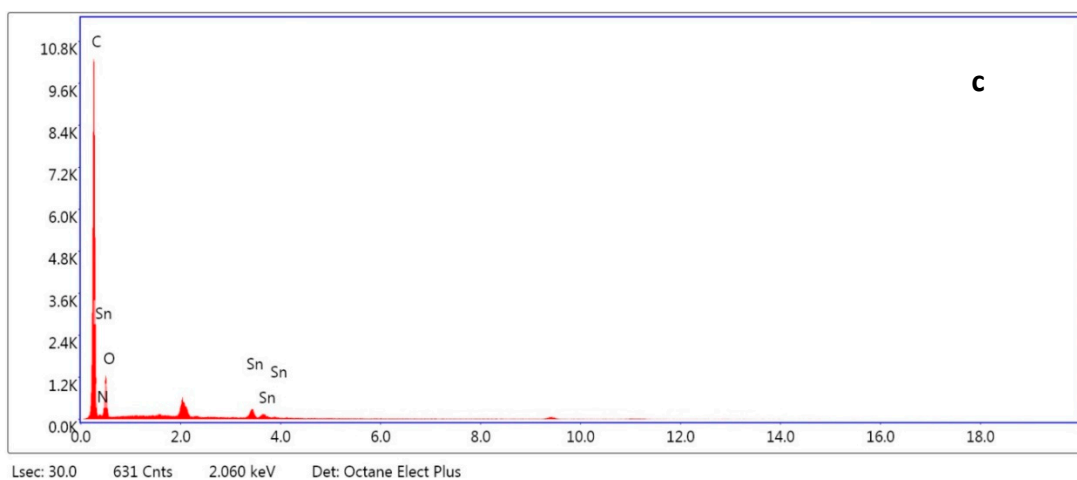

|     |       |       |
|-----|-------|-------|
| C K | 75.43 | 82.87 |
| N K | 0.01  | 0.01  |
| O K | 20.18 | 16.64 |
| SnL | 4.38  | 0.49  |

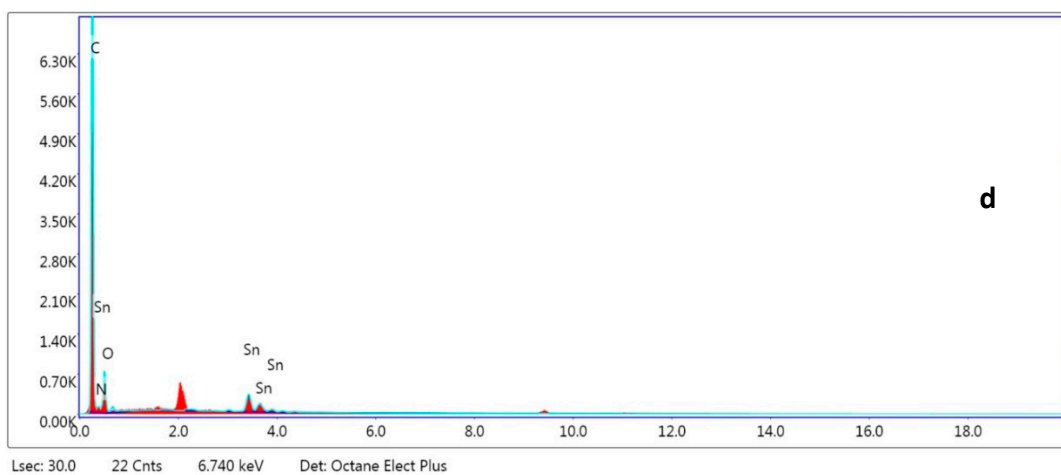

|            |              |              |
|------------|--------------|--------------|
| <b>C K</b> | <b>74.90</b> | <b>85.34</b> |
| <b>N K</b> | 0.01         | 0.01         |
| <b>O K</b> | 15.88        | 13.58        |
| <b>SnL</b> | 9.20         | 1.06         |

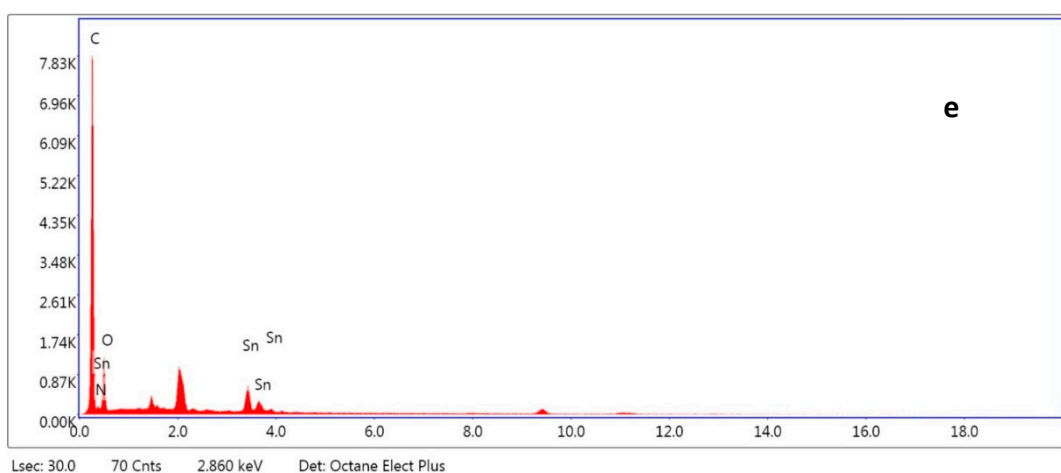

|            |              |              |
|------------|--------------|--------------|
| <b>C K</b> | <b>70.92</b> | <b>82.84</b> |
| <b>N K</b> | 0.01         | 0.01         |
| <b>O K</b> | 18.08        | 15.85        |
| <b>SnL</b> | 10.99        | 1.30         |

**Figure (SI)** EDX analysis for (a) C-PMMA, (b) C-PMMA/SnO<sub>2a</sub>, (c) C-PMMA/SnO<sub>2b</sub>, (d) C-PMMA/SnO<sub>2c</sub>, (e) C-PMMA/SnO<sub>2d</sub>.
